# Supplementary material for: Interactive peer-guided examination preparation course for second-year international full-time medical students: quantitative and qualitative evaluation
Source: PubMed Central journal article supplement (PMC6326399; doi:10.3205/zma001203), 2018-11-30
Supplement: JME-35-57-s-001.pdf [file JME-35-57-s-001.pdf]

#### OPENING:

- What were your reasons for attending HeiTMed in the past semester?

#### INTRODUCTORY:

- What did you learn within the context of HeiTMed?
- What was positive, what was negative?

#### KEY QUESTIONS:

- Which didactic approaches did you get to know in HeiTMed? Which did you find especially helpful? What difficulties did you encounter?
- Did you find it helpful to contribute to the tutorial with your own presentation?
- Was HeiTMed helpful in regard to your studies?

#### ENDING:

- Where do you see room for improvement in the HeiTMed program? What should be changed?
